# Supplementary material
Source: publisher figshare collection journal article supplement (https://acs.figshare.com/ndownloader/files/4065328)
Supplement: Supplementary file 1 [file 4065328]

 
data_scan_0m_c2 
 
_audit_creation_method            SHELXL-97 
_chemical_name_systematic 
; 
 ? 
; 
_chemical_name_common             ? 
_chemical_melting_point           ? 
_chemical_formula_moiety          ? 
_chemical_formula_sum 
 'C36 H57 Br N3 O3 S' 
_chemical_formula_weight          691.82 
 
loop_ 
 _atom_type_symbol 
 _atom_type_description 
 _atom_type_scat_dispersion_real 
 _atom_type_scat_dispersion_imag 
 _atom_type_scat_source 
 'C'  'C'   0.0181   0.0091 
 'International Tables Vol C Tables 4.2.6.8 and 6.1.1.4' 
 'H'  'H'   0.0000   0.0000 
 'International Tables Vol C Tables 4.2.6.8 and 6.1.1.4' 
 'N'  'N'   0.0311   0.0180 
 'International Tables Vol C Tables 4.2.6.8 and 6.1.1.4' 
 'O'  'O'   0.0492   0.0322 
 'International Tables Vol C Tables 4.2.6.8 and 6.1.1.4' 
 'S'  'S'   0.3331   0.5567 
 'International Tables Vol C Tables 4.2.6.8 and 6.1.1.4' 
 'Br'  'Br'  -0.6763   1.2805 
 'International Tables Vol C Tables 4.2.6.8 and 6.1.1.4' 
 
_symmetry_cell_setting            ? 
_symmetry_space_group_name_H-M    ? 
 
loop_ 
 _symmetry_equiv_pos_as_xyz 
 'x, y, z' 
 '-x, y, -z' 
 'x+1/2, y+1/2, z' 
 '-x+1/2, y+1/2, -z' 
 
_cell_length_a                    26.5023(6) 
_cell_length_b                    9.8829(2) 
_cell_length_c                    15.6531(4) 
_cell_angle_alpha                 90.00 
_cell_angle_beta                  106.3670(10) 
_cell_angle_gamma                 90.00 
_cell_volume                      3933.71(16) 
_cell_formula_units_Z             4 
_cell_measurement_temperature     273(2) 
_cell_measurement_reflns_used     ? 
_cell_measurement_theta_min       ? 
_cell_measurement_theta_max       ? 
 
_exptl_crystal_description        ? 
_exptl_crystal_colour             ? 
_exptl_crystal_size_max           0.20 
_exptl_crystal_size_mid           0.05 
_exptl_crystal_size_min           0.02 
_exptl_crystal_density_meas       ? 
_exptl_crystal_density_diffrn     1.168 
_exptl_crystal_density_method     'not measured' 
_exptl_crystal_F_000              1476 
_exptl_absorpt_coefficient_mu     2.184 
_exptl_absorpt_correction_type    ? 
_exptl_absorpt_correction_T_min   0.6692 
_exptl_absorpt_correction_T_max   0.9576 
_exptl_absorpt_process_details    ? 
 
_exptl_special_details 
; 
 ? 
; 
 
_diffrn_ambient_temperature       273(2) 
_diffrn_radiation_wavelength      1.54178 
_diffrn_radiation_type            CuK\a 
_diffrn_radiation_source          'fine-focus sealed tube' 
_diffrn_radiation_monochromator   graphite 
_diffrn_measurement_device_type   ? 
_diffrn_measurement_method        ? 
_diffrn_detector_area_resol_mean  ? 
_diffrn_reflns_number             15530 
_diffrn_reflns_av_R_equivalents   0.0277 
_diffrn_reflns_av_sigmaI/netI     0.0394 
_diffrn_reflns_limit_h_min        -31 
_diffrn_reflns_limit_h_max        31 
_diffrn_reflns_limit_k_min        -11 
_diffrn_reflns_limit_k_max        11 
_diffrn_reflns_limit_l_min        -18 
_diffrn_reflns_limit_l_max        18 
_diffrn_reflns_theta_min          4.80 
_diffrn_reflns_theta_max          66.60 
_reflns_number_total              6194 
_reflns_number_gt                 5976 
_reflns_threshold_expression      >2sigma(I) 
 
_computing_data_collection        ? 
_computing_cell_refinement        ? 
_computing_data_reduction         ? 
_computing_structure_solution     'SHELXS-97 (Sheldrick, 2008)' 
_computing_structure_refinement   'SHELXL-97 (Sheldrick, 2008)' 
_computing_molecular_graphics     ? 
_computing_publication_material   ? 
 
_refine_special_details 
; 
 Refinement of F^2^ against ALL reflections.  The weighted R-factor wR and 
 goodness of fit S are based on F^2^, conventional R-factors R are based 
 on F, with F set to zero for negative F^2^. The threshold expression of 
 F^2^ > 2sigma(F^2^) is used only for calculating R-factors(gt) etc. and is 
 not relevant to the choice of reflections for refinement.  R-factors based 
 on F^2^ are statistically about twice as large as those based on F, and R- 
 factors based on ALL data will be even larger. 
; 
 
_refine_ls_structure_factor_coef  Fsqd  
_refine_ls_matrix_type            full 
_refine_ls_weighting_scheme       calc  
_refine_ls_weighting_details 
 'calc w=1/[\s^2^(Fo^2^)+(0.1522P)^2^+31.4672P] where P=(Fo^2^+2Fc^2^)/3' 
_atom_sites_solution_primary      direct 
_atom_sites_solution_secondary    difmap 
_atom_sites_solution_hydrogens    geom 
_refine_ls_hydrogen_treatment     mixed 
_refine_ls_extinction_method      none 
_refine_ls_extinction_coef        ? 
_refine_ls_abs_structure_details 
 'Flack H D (1983), Acta Cryst. A39, 876-881' 
_refine_ls_abs_structure_Flack    0.01(3) 
_refine_ls_number_reflns          6194 
_refine_ls_number_parameters      415 
_refine_ls_number_restraints      1 
_refine_ls_R_factor_all           0.0707 
_refine_ls_R_factor_gt            0.0691 
_refine_ls_wR_factor_ref          0.2053 
_refine_ls_wR_factor_gt           0.2031 
_refine_ls_goodness_of_fit_ref    1.017 
_refine_ls_restrained_S_all       1.017 
_refine_ls_shift/su_max           2.266 
_refine_ls_shift/su_mean          0.091 
 
loop_ 
 _atom_site_label 
 _atom_site_type_symbol 
 _atom_site_fract_x 
 _atom_site_fract_y 
 _atom_site_fract_z 
 _atom_site_U_iso_or_equiv 
 _atom_site_adp_type 
 _atom_site_occupancy 
 _atom_site_symmetry_multiplicity 
 _atom_site_calc_flag 
 _atom_site_refinement_flags 
 _atom_site_disorder_assembly 
 _atom_site_disorder_group 
Br1 Br 0.07020(2) -0.54387(7) 1.00777(4) 0.0181(2) Uani 1 1 d . . . 
S1 S -0.06192(5) 0.19801(16) 0.82925(9) 0.0110(3) Uani 1 1 d . . . 
O1 O 0.03497(17) 0.0448(5) 0.7167(3) 0.0181(10) Uani 1 1 d . . . 
O2 O 0.22883(17) 0.1793(5) 0.8271(3) 0.0209(11) Uani 1 1 d . . . 
O3 O -0.08243(17) 0.1807(5) 0.9073(3) 0.0154(9) Uani 1 1 d . . . 
N1 N 0.20036(18) -0.0358(8) 0.8169(3) 0.0171(11) Uani 1 1 d . . . 
N2 N 0.1039(2) 0.1227(6) 0.8275(3) 0.0114(11) Uani 1 1 d . . . 
N3 N -0.0335(2) 0.0478(6) 0.8150(4) 0.0147(12) Uani 1 1 d . . . 
C1 C 0.1594(3) -0.2339(8) 0.8692(5) 0.0244(16) Uani 1 1 d . . . 
H1A H 0.1919 -0.2833 0.8865 0.037 Uiso 1 1 calc R . . 
H1B H 0.1305 -0.2963 0.8515 0.037 Uiso 1 1 calc R . . 
H1C H 0.1558 -0.1808 0.9185 0.037 Uiso 1 1 calc R . . 
C2 C 0.1592(3) -0.1413(7) 0.7915(4) 0.0157(14) Uani 1 1 d . . . 
H2 H 0.1251 -0.0952 0.7739 0.019 Uiso 1 1 calc R . . 
C3 C 0.1920(2) 0.0970(7) 0.8035(4) 0.0139(13) Uani 1 1 d . . . 
C4 C 0.1349(2) 0.1485(7) 0.7643(4) 0.0135(13) Uani 1 1 d . . . 
H4 H 0.1193 0.0925 0.7118 0.016 Uiso 1 1 calc R . . 
C5 C 0.0548(2) 0.0712(7) 0.7955(4) 0.0129(13) Uani 1 1 d . . . 
C6 C 0.0226(2) 0.0391(7) 0.8622(4) 0.0107(13) Uani 1 1 d . . . 
H6 H 0.0314 0.1038 0.9116 0.013 Uiso 1 1 calc R . . 
C7 C -0.1160(2) 0.1860(7) 0.7289(4) 0.0113(12) Uani 1 1 d . . . 
C8 C -0.1168(2) 0.2847(7) 0.6617(4) 0.0127(13) Uani 1 1 d . . . 
C9 C -0.1596(3) 0.2836(8) 0.5877(4) 0.0163(14) Uani 1 1 d . . . 
H9 H -0.1613 0.3479 0.5437 0.020 Uiso 1 1 calc R . . 
C10 C -0.2008(2) 0.1911(7) 0.5752(4) 0.0146(13) Uani 1 1 d . . . 
C11 C -0.2455(3) 0.1936(8) 0.4892(4) 0.0162(14) Uani 1 1 d . . . 
H11 H -0.2422 0.2763 0.4567 0.019 Uiso 1 1 calc R . . 
C12 C -0.2995(2) 0.1953(9) 0.5072(4) 0.0236(16) Uani 1 1 d . . . 
H12A H -0.3036 0.1149 0.5390 0.035 Uiso 1 1 calc R . . 
H12B H -0.3266 0.1985 0.4516 0.035 Uiso 1 1 calc R . . 
H12C H -0.3021 0.2734 0.5421 0.035 Uiso 1 1 calc R . . 
C13 C -0.2419(3) 0.0729(8) 0.4309(5) 0.0234(16) Uani 1 1 d . . . 
H13A H -0.2068 0.0657 0.4258 0.035 Uiso 1 1 calc R . . 
H13B H -0.2660 0.0851 0.3728 0.035 Uiso 1 1 calc R . . 
H13C H -0.2508 -0.0082 0.4572 0.035 Uiso 1 1 calc R . . 
C14 C 0.1295(2) 0.1396(7) 0.9232(4) 0.0153(14) Uani 1 1 d . . . 
H14A H 0.1323 0.0532 0.9523 0.023 Uiso 1 1 calc R . . 
H14B H 0.1089 0.1996 0.9482 0.023 Uiso 1 1 calc R . . 
H14C H 0.1640 0.1770 0.9318 0.023 Uiso 1 1 calc R . . 
C15 C 0.2548(3) -0.0868(8) 0.8594(5) 0.0206(16) Uani 1 1 d . . . 
H15 H 0.2524 -0.1856 0.8625 0.025 Uiso 1 1 calc R . . 
C16 C 0.2765(2) -0.0357(13) 0.9557(4) 0.0307(17) Uani 1 1 d . . . 
H16A H 0.2788 0.0613 0.9556 0.046 Uiso 1 1 calc R . . 
H16B H 0.3108 -0.0733 0.9815 0.046 Uiso 1 1 calc R . . 
H16C H 0.2534 -0.0631 0.9899 0.046 Uiso 1 1 calc R . . 
C17 C 0.2927(2) -0.0557(10) 0.8036(4) 0.0230(15) Uani 1 1 d . . . 
H17A H 0.2778 -0.0873 0.7438 0.034 Uiso 1 1 calc R . . 
H17B H 0.3256 -0.1006 0.8292 0.034 Uiso 1 1 calc R . . 
H17C H 0.2984 0.0402 0.8029 0.034 Uiso 1 1 calc R . . 
C18 C 0.1649(3) -0.2208(8) 0.7092(5) 0.0258(16) Uani 1 1 d . . . 
H18A H 0.1656 -0.1583 0.6625 0.039 Uiso 1 1 calc R . . 
H18B H 0.1357 -0.2814 0.6888 0.039 Uiso 1 1 calc R . . 
H18C H 0.1971 -0.2717 0.7254 0.039 Uiso 1 1 calc R . . 
C19 C 0.1306(3) 0.2984(7) 0.7309(4) 0.0165(14) Uani 1 1 d . . . 
C20 C 0.1500(3) 0.4022(8) 0.8063(5) 0.0230(16) Uani 1 1 d . . . 
H20A H 0.1296 0.3941 0.8479 0.034 Uiso 1 1 calc R . . 
H20B H 0.1462 0.4919 0.7817 0.034 Uiso 1 1 calc R . . 
H20C H 0.1864 0.3854 0.8364 0.034 Uiso 1 1 calc R . . 
C21 C 0.0735(3) 0.3276(8) 0.6831(5) 0.0263(17) Uani 1 1 d . . . 
H21A H 0.0606 0.2608 0.6377 0.039 Uiso 1 1 calc R . . 
H21B H 0.0707 0.4157 0.6564 0.039 Uiso 1 1 calc R . . 
H21C H 0.0531 0.3249 0.7250 0.039 Uiso 1 1 calc R . . 
C22 C 0.1616(3) 0.3123(8) 0.6619(5) 0.0224(16) Uani 1 1 d . . . 
H22A H 0.1978 0.2892 0.6890 0.034 Uiso 1 1 calc R . . 
H22B H 0.1594 0.4039 0.6407 0.034 Uiso 1 1 calc R . . 
H22C H 0.1471 0.2525 0.6128 0.034 Uiso 1 1 calc R . . 
C23 C 0.0356(2) -0.1040(7) 0.8974(4) 0.0132(13) Uani 1 1 d . . . 
C24 C 0.0601(2) -0.1269(7) 0.9876(4) 0.0148(14) Uani 1 1 d . . . 
H24 H 0.0692 -0.0537 1.0263 0.018 Uiso 1 1 calc R . . 
C25 C 0.0709(2) -0.2571(8) 1.0202(4) 0.0172(15) Uani 1 1 d . . . 
H25 H 0.0880 -0.2716 1.0801 0.021 Uiso 1 1 calc R . . 
C26 C 0.0561(2) -0.3658(7) 0.9625(4) 0.0154(14) Uani 1 1 d . . . 
C27 C 0.0314(2) -0.3462(7) 0.8725(4) 0.0161(14) Uani 1 1 d . . . 
H27 H 0.0220 -0.4198 0.8343 0.019 Uiso 1 1 calc R . . 
C28 C 0.0212(3) -0.2164(8) 0.8409(4) 0.0159(14) Uani 1 1 d . . . 
H28 H 0.0044 -0.2027 0.7808 0.019 Uiso 1 1 calc R . . 
C29 C -0.1563(3) 0.0918(8) 0.7191(4) 0.0149(14) Uani 1 1 d . . . 
C30 C -0.1573(2) -0.0186(7) 0.7871(4) 0.0144(15) Uani 1 1 d . . . 
H30 H -0.1233 -0.0171 0.8327 0.017 Uiso 1 1 calc R . . 
C31 C -0.2002(3) 0.0111(9) 0.8336(5) 0.0240(16) Uani 1 1 d . . . 
H31A H -0.1910 0.0908 0.8697 0.036 Uiso 1 1 calc R . . 
H31B H -0.2032 -0.0643 0.8706 0.036 Uiso 1 1 calc R . . 
H31C H -0.2333 0.0253 0.7896 0.036 Uiso 1 1 calc R . . 
C32 C -0.1645(3) -0.1617(8) 0.7447(5) 0.0249(17) Uani 1 1 d . . . 
H32A H -0.1959 -0.1635 0.6956 0.037 Uiso 1 1 calc R . . 
H32B H -0.1674 -0.2270 0.7884 0.037 Uiso 1 1 calc R . . 
H32C H -0.1347 -0.1832 0.7238 0.037 Uiso 1 1 calc R . . 
C33 C -0.1984(2) 0.0986(7) 0.6409(4) 0.0150(13) Uani 1 1 d . . . 
H33 H -0.2258 0.0371 0.6337 0.018 Uiso 1 1 calc R . . 
C34 C -0.0737(3) 0.3917(8) 0.6729(4) 0.0175(14) Uani 1 1 d . . . 
H34 H -0.0415 0.3574 0.7151 0.021 Uiso 1 1 calc R . . 
C35 C -0.0617(3) 0.4238(9) 0.5842(5) 0.033(2) Uani 1 1 d . . . 
H35A H -0.0507 0.3426 0.5607 0.049 Uiso 1 1 calc R . . 
H35B H -0.0340 0.4898 0.5943 0.049 Uiso 1 1 calc R . . 
H35C H -0.0927 0.4588 0.5424 0.049 Uiso 1 1 calc R . . 
C36 C -0.0905(3) 0.5188(8) 0.7110(5) 0.0251(16) Uani 1 1 d . . . 
H36A H -0.1243 0.5472 0.6740 0.038 Uiso 1 1 calc R . . 
H36B H -0.0652 0.5891 0.7132 0.038 Uiso 1 1 calc R . . 
H36C H -0.0929 0.5009 0.7701 0.038 Uiso 1 1 calc R . . 
H1 H -0.034(4) 0.005(12) 0.757(8) 0.04(3) Uiso 1 1 d . . . 
 
loop_ 
 _atom_site_aniso_label 
 _atom_site_aniso_U_11 
 _atom_site_aniso_U_22 
 _atom_site_aniso_U_33 
 _atom_site_aniso_U_23 
 _atom_site_aniso_U_13 
 _atom_site_aniso_U_12 
Br1 0.0158(3) 0.0140(4) 0.0252(3) 0.0067(3) 0.0070(2) 0.0037(3) 
S1 0.0100(7) 0.0103(8) 0.0120(7) -0.0002(6) 0.0019(5) -0.0004(5) 
O1 0.014(2) 0.027(3) 0.011(2) 0.000(2) -0.0001(17) -0.0033(19) 
O2 0.014(2) 0.020(3) 0.029(2) -0.002(2) 0.0062(18) -0.004(2) 
O3 0.020(2) 0.010(3) 0.015(2) 0.0003(18) 0.0031(17) 0.0021(18) 
N1 0.011(2) 0.019(3) 0.021(2) 0.003(3) 0.0034(19) 0.004(3) 
N2 0.014(3) 0.012(3) 0.008(2) 0.000(2) 0.0031(19) -0.001(2) 
N3 0.012(3) 0.014(3) 0.017(3) 0.000(2) 0.002(2) 0.002(2) 
C1 0.025(4) 0.022(4) 0.032(4) 0.002(3) 0.018(3) -0.005(3) 
C2 0.017(3) 0.012(4) 0.020(3) 0.003(3) 0.010(3) 0.003(3) 
C3 0.015(3) 0.017(4) 0.010(3) -0.001(3) 0.005(2) 0.003(3) 
C4 0.014(3) 0.015(4) 0.013(3) -0.002(3) 0.005(2) -0.001(3) 
C5 0.015(3) 0.012(4) 0.011(3) 0.002(2) 0.002(2) 0.004(2) 
C6 0.008(3) 0.013(4) 0.010(3) -0.004(3) 0.001(2) -0.001(2) 
C7 0.011(3) 0.011(4) 0.011(3) 0.001(2) 0.002(2) 0.005(2) 
C8 0.011(3) 0.016(4) 0.013(3) -0.006(3) 0.006(2) -0.004(3) 
C9 0.018(3) 0.017(4) 0.013(3) 0.007(3) 0.003(3) 0.002(3) 
C10 0.014(3) 0.018(4) 0.012(3) -0.006(3) 0.004(2) 0.003(3) 
C11 0.016(3) 0.017(4) 0.013(3) 0.004(3) 0.000(2) 0.002(3) 
C12 0.012(3) 0.040(5) 0.015(3) 0.005(3) -0.003(2) 0.002(3) 
C13 0.026(4) 0.024(4) 0.019(3) -0.003(3) 0.003(3) -0.001(3) 
C14 0.014(3) 0.019(4) 0.012(3) -0.003(3) 0.001(2) -0.001(3) 
C15 0.014(3) 0.026(5) 0.024(3) 0.003(3) 0.009(3) 0.008(3) 
C16 0.016(3) 0.054(5) 0.021(3) 0.007(4) 0.003(2) 0.009(4) 
C17 0.017(3) 0.027(4) 0.028(3) 0.004(4) 0.013(3) 0.003(3) 
C18 0.034(4) 0.019(4) 0.024(4) -0.002(3) 0.009(3) 0.002(3) 
C19 0.017(3) 0.014(4) 0.021(3) 0.000(3) 0.008(3) 0.001(3) 
C20 0.028(4) 0.008(4) 0.037(4) -0.001(3) 0.015(3) -0.003(3) 
C21 0.020(4) 0.023(5) 0.034(4) 0.010(3) 0.005(3) 0.000(3) 
C22 0.023(4) 0.026(4) 0.021(3) 0.010(3) 0.011(3) -0.002(3) 
C23 0.008(3) 0.016(4) 0.014(3) 0.001(3) 0.003(2) 0.000(2) 
C24 0.011(3) 0.019(4) 0.014(3) 0.001(3) 0.004(2) 0.002(3) 
C25 0.012(3) 0.027(5) 0.013(3) 0.002(3) 0.004(2) 0.001(3) 
C26 0.010(3) 0.016(4) 0.020(3) 0.004(3) 0.005(2) 0.003(2) 
C27 0.016(3) 0.013(4) 0.019(3) -0.003(3) 0.004(2) -0.002(3) 
C28 0.021(3) 0.015(4) 0.013(3) 0.001(3) 0.008(3) -0.002(3) 
C29 0.013(3) 0.017(4) 0.015(3) -0.001(3) 0.004(2) 0.002(3) 
C30 0.013(3) 0.014(4) 0.013(3) 0.002(3) -0.002(2) -0.004(2) 
C31 0.022(4) 0.031(4) 0.020(3) 0.012(3) 0.008(3) 0.002(3) 
C32 0.029(4) 0.011(4) 0.029(4) 0.003(3) -0.001(3) 0.001(3) 
C33 0.016(3) 0.011(4) 0.017(3) -0.002(3) 0.003(2) -0.003(3) 
C34 0.014(3) 0.021(4) 0.017(3) 0.007(3) 0.003(3) -0.002(3) 
C35 0.028(4) 0.052(7) 0.020(3) 0.005(3) 0.008(3) -0.019(3) 
C36 0.021(4) 0.016(4) 0.034(4) -0.001(3) 0.002(3) -0.011(3) 
 
_geom_special_details 
; 
 All esds (except the esd in the dihedral angle between two l.s. planes) 
 are estimated using the full covariance matrix.  The cell esds are taken 
 into account individually in the estimation of esds in distances, angles 
 and torsion angles; correlations between esds in cell parameters are only 
 used when they are defined by crystal symmetry.  An approximate (isotropic) 
 treatment of cell esds is used for estimating esds involving l.s. planes. 
; 
 
loop_ 
 _geom_bond_atom_site_label_1 
 _geom_bond_atom_site_label_2 
 _geom_bond_distance 
 _geom_bond_site_symmetry_2 
 _geom_bond_publ_flag 
Br1 C26 1.895(7) . ? 
S1 O3 1.481(5) . ? 
S1 N3 1.707(6) . ? 
S1 C7 1.807(6) . ? 
O1 C5 1.226(8) . ? 
O2 C3 1.244(9) . ? 
N1 C3 1.337(11) . ? 
N1 C2 1.480(9) . ? 
N1 C15 1.496(8) . ? 
N2 C5 1.354(9) . ? 
N2 C14 1.469(8) . ? 
N2 C4 1.477(8) . ? 
N3 C6 1.466(8) . ? 
N3 H1 1.00(12) . ? 
C1 C2 1.520(10) . ? 
C1 H1A 0.9600 . ? 
C1 H1B 0.9600 . ? 
C1 H1C 0.9600 . ? 
C2 C18 1.553(10) . ? 
C2 H2 0.9800 . ? 
C3 C4 1.550(9) . ? 
C4 C19 1.564(10) . ? 
C4 H4 0.9800 . ? 
C5 C6 1.556(9) . ? 
C6 C23 1.521(10) . ? 
C6 H6 0.9800 . ? 
C7 C29 1.393(10) . ? 
C7 C8 1.430(9) . ? 
C8 C9 1.375(9) . ? 
C8 C34 1.531(9) . ? 
C9 C10 1.393(10) . ? 
C9 H9 0.9300 . ? 
C10 C33 1.365(10) . ? 
C10 C11 1.523(9) . ? 
C11 C13 1.521(10) . ? 
C11 C12 1.535(9) . ? 
C11 H11 0.9800 . ? 
C12 H12A 0.9600 . ? 
C12 H12B 0.9600 . ? 
C12 H12C 0.9600 . ? 
C13 H13A 0.9600 . ? 
C13 H13B 0.9600 . ? 
C13 H13C 0.9600 . ? 
C14 H14A 0.9600 . ? 
C14 H14B 0.9600 . ? 
C14 H14C 0.9600 . ? 
C15 C17 1.537(9) . ? 
C15 C16 1.539(10) . ? 
C15 H15 0.9800 . ? 
C16 H16A 0.9600 . ? 
C16 H16B 0.9600 . ? 
C16 H16C 0.9600 . ? 
C17 H17A 0.9600 . ? 
C17 H17B 0.9600 . ? 
C17 H17C 0.9600 . ? 
C18 H18A 0.9600 . ? 
C18 H18B 0.9600 . ? 
C18 H18C 0.9600 . ? 
C19 C21 1.513(10) . ? 
C19 C20 1.540(10) . ? 
C19 C22 1.538(9) . ? 
C20 H20A 0.9600 . ? 
C20 H20B 0.9600 . ? 
C20 H20C 0.9600 . ? 
C21 H21A 0.9600 . ? 
C21 H21B 0.9600 . ? 
C21 H21C 0.9600 . ? 
C22 H22A 0.9600 . ? 
C22 H22B 0.9600 . ? 
C22 H22C 0.9600 . ? 
C23 C24 1.395(9) . ? 
C23 C28 1.405(10) . ? 
C24 C25 1.385(11) . ? 
C24 H24 0.9300 . ? 
C25 C26 1.387(11) . ? 
C25 H25 0.9300 . ? 
C26 C27 1.389(9) . ? 
C27 C28 1.374(11) . ? 
C27 H27 0.9300 . ? 
C28 H28 0.9300 . ? 
C29 C33 1.406(9) . ? 
C29 C30 1.529(9) . ? 
C30 C31 1.542(9) . ? 
C30 C32 1.551(10) . ? 
C30 H30 0.9800 . ? 
C31 H31A 0.9600 . ? 
C31 H31B 0.9600 . ? 
C31 H31C 0.9600 . ? 
C32 H32A 0.9600 . ? 
C32 H32B 0.9600 . ? 
C32 H32C 0.9600 . ? 
C33 H33 0.9300 . ? 
C34 C36 1.512(11) . ? 
C34 C35 1.541(9) . ? 
C34 H34 0.9800 . ? 
C35 H35A 0.9600 . ? 
C35 H35B 0.9600 . ? 
C35 H35C 0.9600 . ? 
C36 H36A 0.9600 . ? 
C36 H36B 0.9600 . ? 
C36 H36C 0.9600 . ? 
 
loop_ 
 _geom_angle_atom_site_label_1 
 _geom_angle_atom_site_label_2 
 _geom_angle_atom_site_label_3 
 _geom_angle 
 _geom_angle_site_symmetry_1 
 _geom_angle_site_symmetry_3 
 _geom_angle_publ_flag 
O3 S1 N3 106.6(3) . . ? 
O3 S1 C7 108.9(3) . . ? 
N3 S1 C7 95.7(3) . . ? 
C3 N1 C2 124.9(5) . . ? 
C3 N1 C15 119.8(6) . . ? 
C2 N1 C15 115.3(6) . . ? 
C5 N2 C14 122.6(5) . . ? 
C5 N2 C4 118.3(5) . . ? 
C14 N2 C4 118.7(5) . . ? 
C6 N3 S1 114.0(4) . . ? 
C6 N3 H1 101(7) . . ? 
S1 N3 H1 126(7) . . ? 
C2 C1 H1A 109.5 . . ? 
C2 C1 H1B 109.5 . . ? 
H1A C1 H1B 109.5 . . ? 
C2 C1 H1C 109.4 . . ? 
H1A C1 H1C 109.5 . . ? 
H1B C1 H1C 109.5 . . ? 
N1 C2 C1 111.9(6) . . ? 
N1 C2 C18 110.0(5) . . ? 
C1 C2 C18 112.3(6) . . ? 
N1 C2 H2 107.5 . . ? 
C1 C2 H2 107.5 . . ? 
C18 C2 H2 107.4 . . ? 
O2 C3 N1 120.9(6) . . ? 
O2 C3 C4 120.0(6) . . ? 
N1 C3 C4 119.0(6) . . ? 
N2 C4 C3 110.1(5) . . ? 
N2 C4 C19 112.6(5) . . ? 
C3 C4 C19 114.6(5) . . ? 
N2 C4 H4 106.3 . . ? 
C3 C4 H4 106.3 . . ? 
C19 C4 H4 106.3 . . ? 
O1 C5 N2 123.2(6) . . ? 
O1 C5 C6 118.1(6) . . ? 
N2 C5 C6 118.7(5) . . ? 
N3 C6 C23 109.3(5) . . ? 
N3 C6 C5 108.7(5) . . ? 
C23 C6 C5 108.8(5) . . ? 
N3 C6 H6 109.9 . . ? 
C23 C6 H6 110.0 . . ? 
C5 C6 H6 110.0 . . ? 
C29 C7 C8 121.5(5) . . ? 
C29 C7 S1 122.4(5) . . ? 
C8 C7 S1 116.0(5) . . ? 
C9 C8 C7 116.9(6) . . ? 
C9 C8 C34 121.0(6) . . ? 
C7 C8 C34 122.1(5) . . ? 
C8 C9 C10 123.5(6) . . ? 
C8 C9 H9 118.2 . . ? 
C10 C9 H9 118.3 . . ? 
C33 C10 C9 117.7(6) . . ? 
C33 C10 C11 122.4(6) . . ? 
C9 C10 C11 119.8(6) . . ? 
C13 C11 C10 110.7(6) . . ? 
C13 C11 C12 109.7(6) . . ? 
C10 C11 C12 111.9(5) . . ? 
C13 C11 H11 108.1 . . ? 
C10 C11 H11 108.1 . . ? 
C12 C11 H11 108.2 . . ? 
C11 C12 H12A 109.5 . . ? 
C11 C12 H12B 109.5 . . ? 
H12A C12 H12B 109.5 . . ? 
C11 C12 H12C 109.4 . . ? 
H12A C12 H12C 109.5 . . ? 
H12B C12 H12C 109.5 . . ? 
C11 C13 H13A 109.4 . . ? 
C11 C13 H13B 109.5 . . ? 
H13A C13 H13B 109.5 . . ? 
C11 C13 H13C 109.5 . . ? 
H13A C13 H13C 109.5 . . ? 
H13B C13 H13C 109.5 . . ? 
N2 C14 H14A 109.5 . . ? 
N2 C14 H14B 109.5 . . ? 
H14A C14 H14B 109.5 . . ? 
N2 C14 H14C 109.4 . . ? 
H14A C14 H14C 109.5 . . ? 
H14B C14 H14C 109.5 . . ? 
N1 C15 C17 112.5(6) . . ? 
N1 C15 C16 111.8(6) . . ? 
C17 C15 C16 111.5(6) . . ? 
N1 C15 H15 106.9 . . ? 
C17 C15 H15 106.9 . . ? 
C16 C15 H15 106.8 . . ? 
C15 C16 H16A 109.3 . . ? 
C15 C16 H16B 109.5 . . ? 
H16A C16 H16B 109.5 . . ? 
C15 C16 H16C 109.5 . . ? 
H16A C16 H16C 109.5 . . ? 
H16B C16 H16C 109.5 . . ? 
C15 C17 H17A 109.5 . . ? 
C15 C17 H17B 109.5 . . ? 
H17A C17 H17B 109.5 . . ? 
C15 C17 H17C 109.4 . . ? 
H17A C17 H17C 109.5 . . ? 
H17B C17 H17C 109.5 . . ? 
C2 C18 H18A 109.5 . . ? 
C2 C18 H18B 109.5 . . ? 
H18A C18 H18B 109.5 . . ? 
C2 C18 H18C 109.4 . . ? 
H18A C18 H18C 109.5 . . ? 
H18B C18 H18C 109.5 . . ? 
C21 C19 C20 108.9(6) . . ? 
C21 C19 C22 107.1(6) . . ? 
C20 C19 C22 110.4(6) . . ? 
C21 C19 C4 108.4(6) . . ? 
C20 C19 C4 113.4(6) . . ? 
C22 C19 C4 108.4(6) . . ? 
C19 C20 H20A 109.5 . . ? 
C19 C20 H20B 109.4 . . ? 
H20A C20 H20B 109.5 . . ? 
C19 C20 H20C 109.5 . . ? 
H20A C20 H20C 109.5 . . ? 
H20B C20 H20C 109.5 . . ? 
C19 C21 H21A 109.5 . . ? 
C19 C21 H21B 109.5 . . ? 
H21A C21 H21B 109.5 . . ? 
C19 C21 H21C 109.5 . . ? 
H21A C21 H21C 109.5 . . ? 
H21B C21 H21C 109.5 . . ? 
C19 C22 H22A 109.5 . . ? 
C19 C22 H22B 109.5 . . ? 
H22A C22 H22B 109.5 . . ? 
C19 C22 H22C 109.4 . . ? 
H22A C22 H22C 109.5 . . ? 
H22B C22 H22C 109.5 . . ? 
C24 C23 C28 118.4(7) . . ? 
C24 C23 C6 120.7(6) . . ? 
C28 C23 C6 120.9(5) . . ? 
C25 C24 C23 120.8(7) . . ? 
C25 C24 H24 119.6 . . ? 
C23 C24 H24 119.6 . . ? 
C24 C25 C26 119.3(6) . . ? 
C24 C25 H25 120.4 . . ? 
C26 C25 H25 120.4 . . ? 
C25 C26 C27 121.2(7) . . ? 
C25 C26 Br1 119.1(5) . . ? 
C27 C26 Br1 119.7(5) . . ? 
C28 C27 C26 119.0(6) . . ? 
C28 C27 H27 120.5 . . ? 
C26 C27 H27 120.5 . . ? 
C27 C28 C23 121.3(6) . . ? 
C27 C28 H28 119.3 . . ? 
C23 C28 H28 119.3 . . ? 
C7 C29 C33 117.4(6) . . ? 
C7 C29 C30 124.3(6) . . ? 
C33 C29 C30 118.3(6) . . ? 
C29 C30 C31 110.7(6) . . ? 
C29 C30 C32 112.1(5) . . ? 
C31 C30 C32 110.9(6) . . ? 
C29 C30 H30 107.7 . . ? 
C31 C30 H30 107.6 . . ? 
C32 C30 H30 107.6 . . ? 
C30 C31 H31A 109.4 . . ? 
C30 C31 H31B 109.5 . . ? 
H31A C31 H31B 109.5 . . ? 
C30 C31 H31C 109.5 . . ? 
H31A C31 H31C 109.5 . . ? 
H31B C31 H31C 109.5 . . ? 
C30 C32 H32A 109.4 . . ? 
C30 C32 H32B 109.6 . . ? 
H32A C32 H32B 109.5 . . ? 
C30 C32 H32C 109.4 . . ? 
H32A C32 H32C 109.5 . . ? 
H32B C32 H32C 109.5 . . ? 
C10 C33 C29 123.0(6) . . ? 
C10 C33 H33 118.5 . . ? 
C29 C33 H33 118.4 . . ? 
C36 C34 C8 108.9(5) . . ? 
C36 C34 C35 110.1(7) . . ? 
C8 C34 C35 112.1(6) . . ? 
C36 C34 H34 108.5 . . ? 
C8 C34 H34 108.6 . . ? 
C35 C34 H34 108.5 . . ? 
C34 C35 H35A 109.5 . . ? 
C34 C35 H35B 109.5 . . ? 
H35A C35 H35B 109.5 . . ? 
C34 C35 H35C 109.5 . . ? 
H35A C35 H35C 109.5 . . ? 
H35B C35 H35C 109.5 . . ? 
C34 C36 H36A 109.4 . . ? 
C34 C36 H36B 109.5 . . ? 
H36A C36 H36B 109.5 . . ? 
C34 C36 H36C 109.5 . . ? 
H36A C36 H36C 109.5 . . ? 
H36B C36 H36C 109.5 . . ? 
 
loop_ 
 _geom_torsion_atom_site_label_1 
 _geom_torsion_atom_site_label_2 
 _geom_torsion_atom_site_label_3 
 _geom_torsion_atom_site_label_4 
 _geom_torsion 
 _geom_torsion_site_symmetry_1 
 _geom_torsion_site_symmetry_2 
 _geom_torsion_site_symmetry_3 
 _geom_torsion_site_symmetry_4 
 _geom_torsion_publ_flag 
O3 S1 N3 C6 -91.2(5) . . . . ? 
C7 S1 N3 C6 157.1(5) . . . . ? 
C3 N1 C2 C1 -127.7(6) . . . . ? 
C15 N1 C2 C1 53.1(7) . . . . ? 
C3 N1 C2 C18 106.7(7) . . . . ? 
C15 N1 C2 C18 -72.5(7) . . . . ? 
C2 N1 C3 O2 179.8(5) . . . . ? 
C15 N1 C3 O2 -1.1(9) . . . . ? 
C2 N1 C3 C4 4.2(9) . . . . ? 
C15 N1 C3 C4 -176.7(5) . . . . ? 
C5 N2 C4 C3 -135.4(6) . . . . ? 
C14 N2 C4 C3 37.9(8) . . . . ? 
C5 N2 C4 C19 95.4(7) . . . . ? 
C14 N2 C4 C19 -91.3(7) . . . . ? 
O2 C3 C4 N2 -110.2(6) . . . . ? 
N1 C3 C4 N2 65.4(7) . . . . ? 
O2 C3 C4 C19 17.9(8) . . . . ? 
N1 C3 C4 C19 -166.4(5) . . . . ? 
C14 N2 C5 O1 -172.9(6) . . . . ? 
C4 N2 C5 O1 0.1(10) . . . . ? 
C14 N2 C5 C6 4.9(9) . . . . ? 
C4 N2 C5 C6 177.9(6) . . . . ? 
S1 N3 C6 C23 143.1(4) . . . . ? 
S1 N3 C6 C5 -98.3(5) . . . . ? 
O1 C5 C6 N3 -28.7(8) . . . . ? 
N2 C5 C6 N3 153.4(6) . . . . ? 
O1 C5 C6 C23 90.3(7) . . . . ? 
N2 C5 C6 C23 -87.6(7) . . . . ? 
O3 S1 C7 C29 -40.4(6) . . . . ? 
N3 S1 C7 C29 69.3(6) . . . . ? 
O3 S1 C7 C8 135.9(5) . . . . ? 
N3 S1 C7 C8 -114.4(5) . . . . ? 
C29 C7 C8 C9 1.0(9) . . . . ? 
S1 C7 C8 C9 -175.3(5) . . . . ? 
C29 C7 C8 C34 178.1(6) . . . . ? 
S1 C7 C8 C34 1.7(8) . . . . ? 
C7 C8 C9 C10 -1.1(10) . . . . ? 
C34 C8 C9 C10 -178.2(6) . . . . ? 
C8 C9 C10 C33 1.0(10) . . . . ? 
C8 C9 C10 C11 -177.3(6) . . . . ? 
C33 C10 C11 C13 -70.7(8) . . . . ? 
C9 C10 C11 C13 107.5(8) . . . . ? 
C33 C10 C11 C12 51.9(9) . . . . ? 
C9 C10 C11 C12 -129.8(7) . . . . ? 
C3 N1 C15 C17 -62.5(8) . . . . ? 
C2 N1 C15 C17 116.7(7) . . . . ? 
C3 N1 C15 C16 63.9(8) . . . . ? 
C2 N1 C15 C16 -116.8(7) . . . . ? 
N2 C4 C19 C21 -61.0(7) . . . . ? 
C3 C4 C19 C21 172.2(6) . . . . ? 
N2 C4 C19 C20 60.0(7) . . . . ? 
C3 C4 C19 C20 -66.8(7) . . . . ? 
N2 C4 C19 C22 -176.9(5) . . . . ? 
C3 C4 C19 C22 56.3(7) . . . . ? 
N3 C6 C23 C24 -125.1(6) . . . . ? 
C5 C6 C23 C24 116.3(6) . . . . ? 
N3 C6 C23 C28 52.1(8) . . . . ? 
C5 C6 C23 C28 -66.5(7) . . . . ? 
C28 C23 C24 C25 1.4(9) . . . . ? 
C6 C23 C24 C25 178.7(6) . . . . ? 
C23 C24 C25 C26 -1.5(9) . . . . ? 
C24 C25 C26 C27 1.2(9) . . . . ? 
C24 C25 C26 Br1 -179.2(5) . . . . ? 
C25 C26 C27 C28 -0.7(9) . . . . ? 
Br1 C26 C27 C28 179.7(5) . . . . ? 
C26 C27 C28 C23 0.6(10) . . . . ? 
C24 C23 C28 C27 -0.9(10) . . . . ? 
C6 C23 C28 C27 -178.2(6) . . . . ? 
C8 C7 C29 C33 -0.9(9) . . . . ? 
S1 C7 C29 C33 175.2(5) . . . . ? 
C8 C7 C29 C30 178.5(6) . . . . ? 
S1 C7 C29 C30 -5.4(9) . . . . ? 
C7 C29 C30 C31 110.2(7) . . . . ? 
C33 C29 C30 C31 -70.5(8) . . . . ? 
C7 C29 C30 C32 -125.4(7) . . . . ? 
C33 C29 C30 C32 54.0(8) . . . . ? 
C9 C10 C33 C29 -0.9(10) . . . . ? 
C11 C10 C33 C29 177.4(6) . . . . ? 
C7 C29 C33 C10 0.8(10) . . . . ? 
C30 C29 C33 C10 -178.6(6) . . . . ? 
C9 C8 C34 C36 83.4(7) . . . . ? 
C7 C8 C34 C36 -93.5(7) . . . . ? 
C9 C8 C34 C35 -38.7(9) . . . . ? 
C7 C8 C34 C35 144.4(7) . . . . ? 
 
_diffrn_measured_fraction_theta_max    0.976 
_diffrn_reflns_theta_full              66.60 
_diffrn_measured_fraction_theta_full   0.976 
_refine_diff_density_max    5.022 
_refine_diff_density_min   -0.469 
_refine_diff_density_rms    0.188 
